# Supplementary material for: Electronic, magnetic, catalytic, and electrochemical properties of two-dimensional Janus transition metal chalcogenides
Source: Royal Society of Chemistry journal article supplement (doi:10.1039/c8ta01202d), 2018-01-01
Supplement: c8ta01202d1.pdf [file c8ta01202d1.pdf]

## Supporting Information

Electronic, Magnetic, Catalytic, and Electrochemical properties of Two-Dimensional  
Janus Transition Metal Chalcogenides

Wenzhou Chen,<sup>a</sup> Yuanju Qu<sup>b</sup>, Lingmin Yao<sup>c</sup>, Xianhua Hou<sup>d</sup>, Xingqiang Shi<sup>\*e</sup> and Hui  
Pan<sup>\*a</sup>

<sup>a</sup>Institute of Applied Physics and Materials Engineering, University of Macau, Macao  
SAR

<sup>b</sup>College of Physics and Communication Electronics, Jiangxi Normal University,  
Nanchang 330022, China

<sup>c</sup>School of Physics and Electronic Engineering, Guangzhou University, Guangzhou,  
510006, China

<sup>d</sup>School of Physics and Telecommunication Engineering, South China Normal University,  
Guangzhou 510006, P. R. China

<sup>e</sup>Department of Physics, Southern University of Science and Technology, Shenzhen  
518055, China

\* Corresponding Authors: [huipan@umac.mo](mailto:huipan@umac.mo) (H.P.); Tel: (853)88224427; Fax:  
(853)88222426; [shixq@sustc.edu.cn](mailto:shixq@sustc.edu.cn) (X. Q. S.)

Table S1 Calculated total energies of the unit cells of the MSXs (M = Ti or V; and X = C, N,  
Si or P) monolayers as a function of k-point grids.

| k-grid  | TiSC (eV) | TiSSi (eV) | TiSP (eV) | VSC (eV) | VSN (eV) | VSSi (eV) |
|---------|-----------|------------|-----------|----------|----------|-----------|
| 10×10×1 | -21.5471  | -18.0983   | -19.0169  | -21.7394 | -23.1386 | -18.5501  |
| 12×12×1 | -21.5471  | -18.0983   | -19.0198  | -21.7407 | -23.1386 | -18.5547  |
| 14×14×1 | -21.5471  | -18.0983   | -19.0230  | -21.7398 | -23.1387 | -18.5582  |
| 16×16×1 | -21.5471  | -18.0983   | -19.0248  | -21.7402 | -23.1387 | -18.5583  |
| 18×18×1 | -21.5471  | -18.0983   | -19.0235  | -21.7399 | -23.1387 | -18.5564  |
| 20×20×1 | -21.5471  | -18.0983   | -19.0225  | -21.7400 | -23.1387 | -18.5557  |
| 22×22×1 | -21.5471  | -18.0983   | -19.0225  | -21.7401 | -23.1387 | -18.5562  |

22 Table S2 Calculated total energies of the supercell ( $3 \times 3 \times 1$  unit cells) of the MSXs (M = Ti  
 23 or V; and X = C, N, Si or P) monolayers as a function of k-point grids.

| K-grid                | TiSC (eV) | TiSSi (eV) | TiSP (eV) | VSC (eV)  | VSN (eV)  | VSSi (eV) |
|-----------------------|-----------|------------|-----------|-----------|-----------|-----------|
| $1 \times 1 \times 1$ | -193.8808 | -162.9363  | -170.4312 | -195.6340 | -207.8329 | -167.0570 |
| $3 \times 3 \times 1$ | -193.9245 | -162.8849  | -171.2200 | -195.6605 | -208.2468 | -166.9888 |
| $5 \times 5 \times 1$ | -193.9245 | -162.8849  | -171.1925 | -195.6642 | -208.2484 | -167.0172 |

24

25 Table S3 Calculated total energies of supercell ( $2 \times 2 \times 1$  unit cell) of VSSi-1H monolayer as a  
 26 function of k-point grids. The energy cutoff is fixed at 700 eV.

| k grids                 | NM       | FM       | AFM-1    | AFM-2    |
|-------------------------|----------|----------|----------|----------|
| $5 \times 5 \times 1$   | -74.2015 | -74.2415 | -74.2015 | -74.2016 |
| $7 \times 7 \times 1$   | -74.2339 | -74.2207 | -74.2339 | -74.2339 |
| $9 \times 9 \times 1$   | -74.2266 | -74.2354 | -74.2265 | -74.2266 |
| $11 \times 11 \times 1$ | -74.2259 | -74.2315 | -74.2258 | -74.2259 |
| $13 \times 13 \times 1$ | -74.2293 | -74.2322 | -74.2292 | -74.2293 |

27

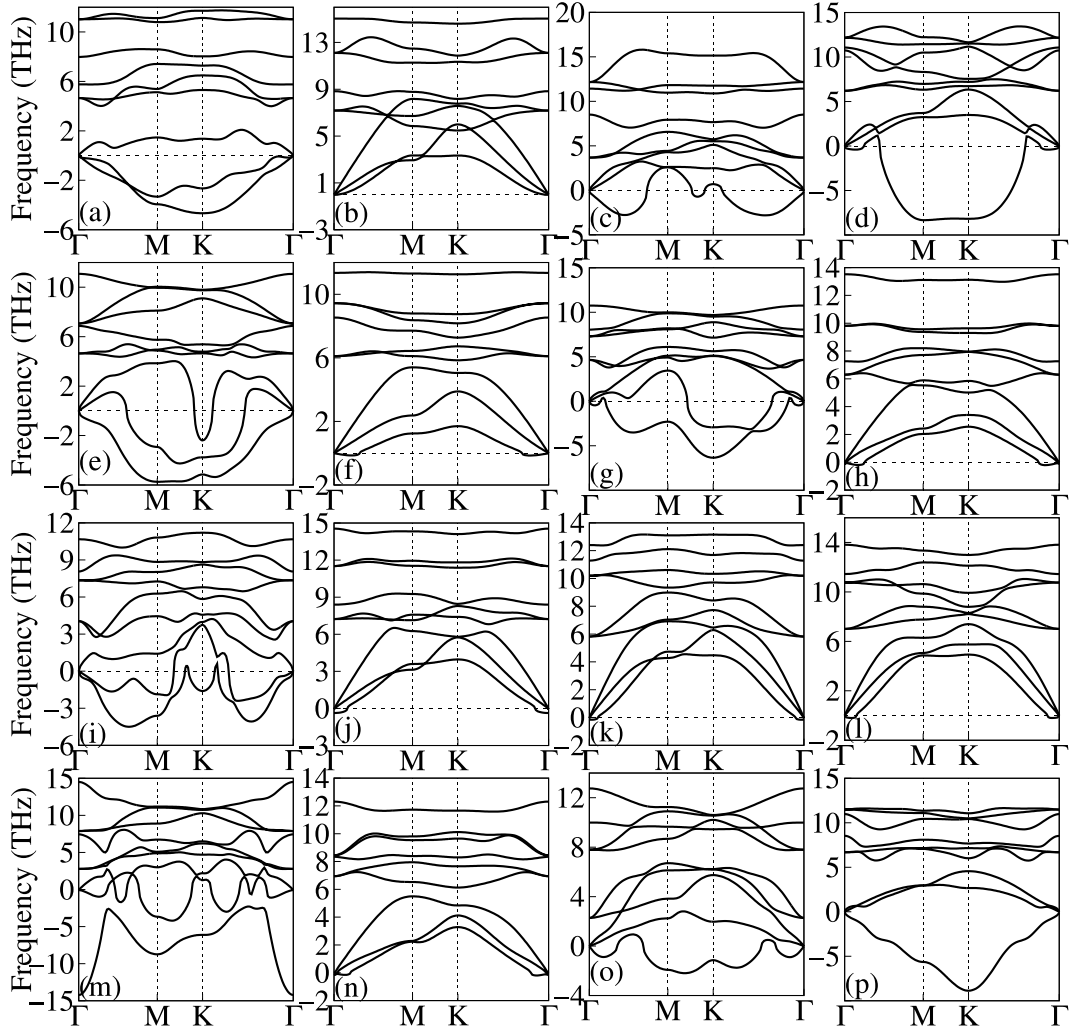

28

29 Figure S1 Calculated phonon dispersions of the Janus MSXs (M = Ti or V; and X = C, N, Si or P)  
 30 monolayers: (a) TiSC-1T, (b) TiSC-1H, (c) TiSN-1T, (d) TiSN-1H, (e) TiSSi-1T, (f) TiSSi-1H, (g)  
 31 TiSP-1T, (h) TiSP-1H, (i) VSC-1T, (j) VSC-1H, (k) VSN-1T, (l) VSN-1H, (m) VSSi-1T, (n) VSSi-  
 32 1H, (o) VSP-1T, and (p) VSP-1H.

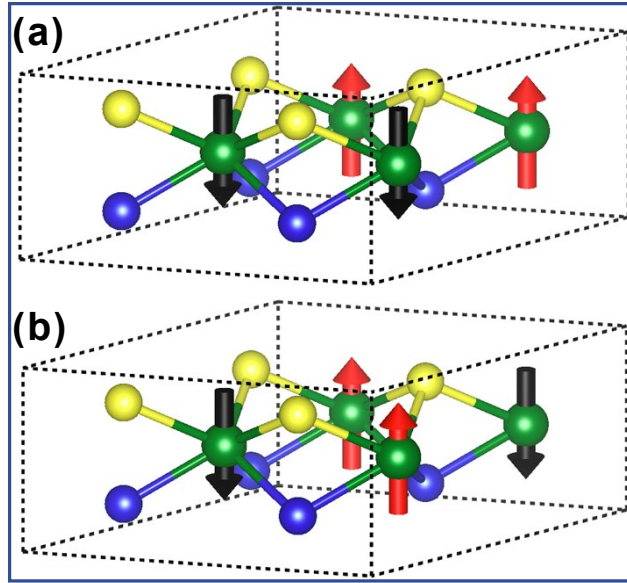

33

34 Figure S2 Anti-ferromagnetic (AFM) spin configurations of the VSC-1H monolayer: (a) AFM-  
 35 1 and (b) AFM-2; Yellow, green, and blue balls represent S, V, and C atoms, respectively; Black  
 36 and red arrows represent down and up spins, respectively.

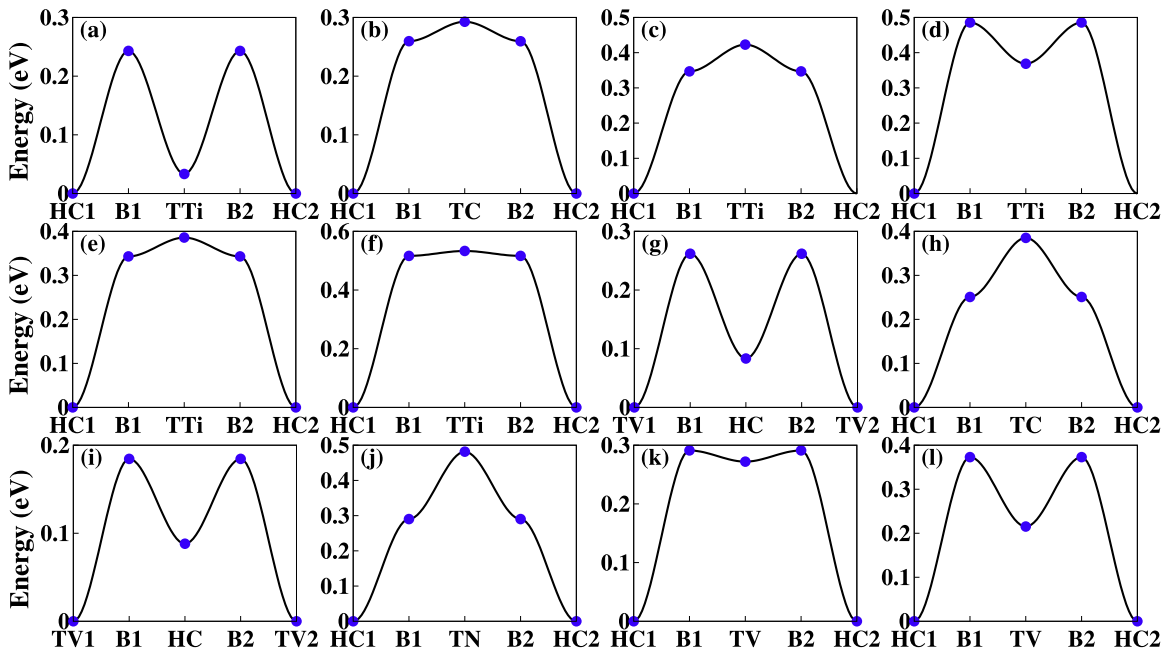

37

38 Figure S3 Calculated Li diffusion energies on the surfaces of Janus MSXs ( $M = \text{Ti}$  or  $\text{V}$ ; and  $X =$   
 39  $\text{C}$ ,  $\text{N}$ ,  $\text{Si}$  or  $\text{P}$ ): (a) S-surface of  $\text{TiSC-1H}$ , (b) C-surface of  $\text{TiSC-1H}$ , (c) S-surface of  $\text{TiSSi-1H}$ , (d)  
 40 Si-surface of  $\text{TiSSi-1H}$ , (e) S-surface of the  $\text{TiSP-1H}$ , (f) P-surface of the  $\text{TiSP-1H}$ , (g) S-surface  
 41 of the  $\text{VSC-1H}$ , (h) C-surface of the  $\text{VSC-1H}$ , (i) S-surface of the  $\text{VSN-1T}$ , (j) N-surface of the  
 42  $\text{VSN-1T}$ , (k) S-surface of the  $\text{VSSi-1H}$ , and (l) Si-surface of the  $\text{VSSi-1H}$ . HC - the hexagonal

43 center, TM - on the top of M, TC - on the top of C, and B1 (B2) - the bridge site between the  
 44 corresponding stable site and intermediate position, as shown in text and figures 5&6.

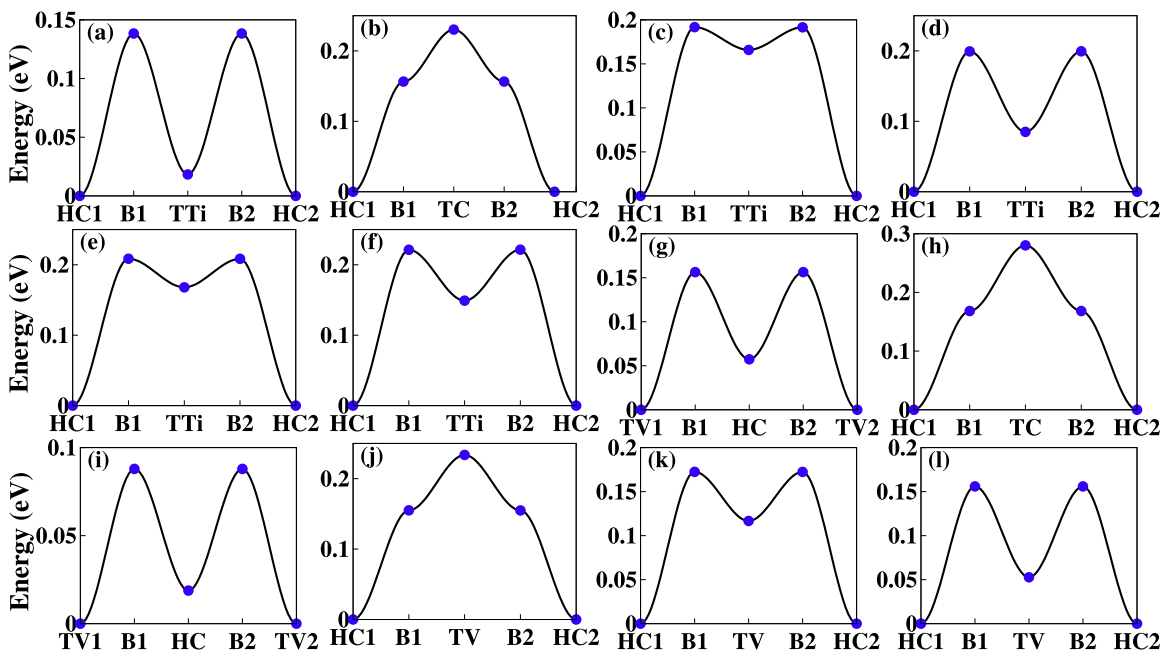

46 Figure S4 Calculated Na diffusion energies on the surfaces of Janus MSXs (M = Ti or V; and X =  
 47 C, N, Si or P): (a) S-surface of TiSC-1H, (b) C-surface of TiSC-1H, (c) S-surface of TiSSi-1H, (d)  
 48 Si-surface of TiSSi-1H, (e) S-surface of the TiSP-1H, (f) P-surface of the TiSP-1H, (g) S-surface  
 49 of the VSC-1H, (h) C-surface of the VSC-1H, (i) S-surface of the VSN-1T, (j) N-surface of the  
 50 VSN-1T, (k) S-surface of the VSSi-1H, and (l) Si-surface of the VSSi-1H.

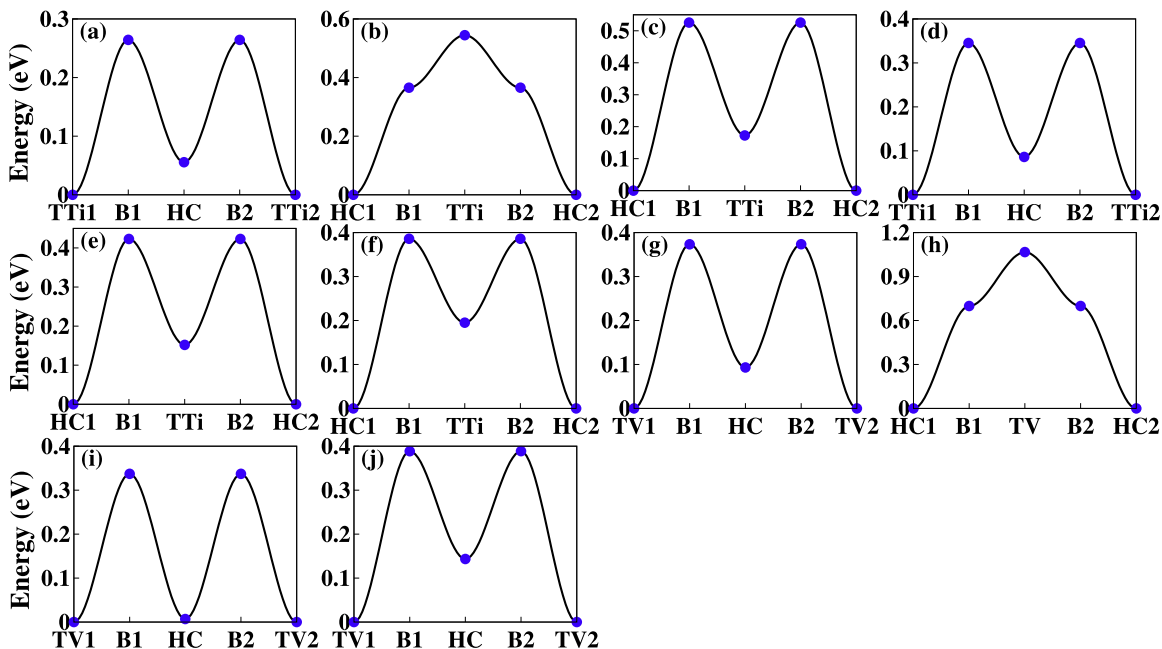

51

52 Figure S5 Calculated Mg diffusion energies on the surfaces of Janus MSXs (M = Ti or V; and X =  
 53 C, N, Si or P): (a) S-surface of TiSC-1H, (b) C-surface of TiSC-1H, (c) S-surface of TiSSi-1H, (d)  
 54 Si-surface of TiSSi-1H, (e) S-surface of the TiSP-1H, (f) P-surface of the TiSP-1H, (g) S-surface  
 55 of the VSC-1H, (h) C-surface of the VSC-1H, (i) S-surface of the VSSi-1H, and (j) Si-surface of  
 56 the VSSi-1H.

57 Table S4 Calculated H-adsorption energies (eV) on MSXs (M = Ti or V; and X = C, N, Si or P)  
 58 monolayers at difference adsorption sites:  $S_{ad}$  – adsorption site; TX, HC-X, and TM-X refer to the  
 59 TX, HC, and TM sites on the X-surfaces of MSXs, respectively; TS, HC-S, and TM-S represent  
 60 the TS, HC, and TM sites on the S-surfaces of MSXs, respectively.

| $S_{ad}$ | TX    | HC-X  | TM-X  | TS    | HC-S | TM-S |
|----------|-------|-------|-------|-------|------|------|
| TiSC-1H  | -0.01 | 1.53  | 1.61  | 1.32  | 2.44 | 1.61 |
| TiSSi-1H | 0.13  | 0.69  | 0.09  | 1.30  | 2.60 | 1.09 |
| TiSP-1H  | -0.99 | 1.59  | 0.22  | -0.29 | 2.25 | 0.50 |
| VSC-1H   | -0.56 | 1.00  | -0.01 | 0.61  | 1.85 | 2.18 |
| VSN-1T   | 2.04  | -0.34 | 1.60  | 0.91  | 1.24 | 1.32 |
| VSSi-1H  | -0.48 | 0.62  | -0.22 | 0.58  | 2.39 | 0.54 |

61

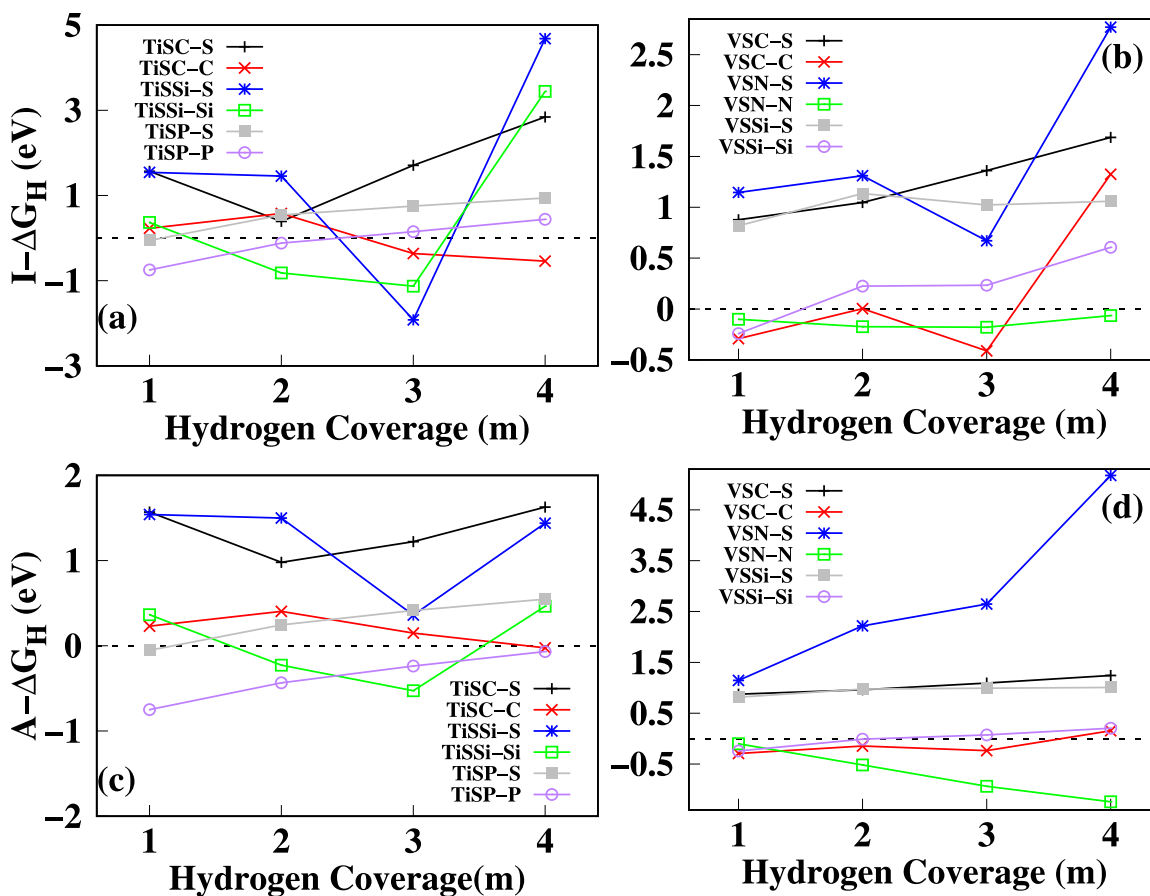

62

63 Figure S6 Calculated  $I-\Delta G_H$  of (a) TiSX (X = C, Si, or P) and (b) VSX (X = C, N, or Si) monolayers  
 64 as a function of H coverage on the S- and X- surfaces; Calculated  $A-\Delta G_H$  of (c) TiSX (X = C, Si,  
 65 or P) and (d) VSX (X = C, N, or Si) monolayers as a function of H coverage on the S- and X-  
 66 surfaces;  $I-\Delta G_H$ : differential Gibbs free energy;  $A-\Delta G_H$ : average Gibbs free energy.
